# Supplementary material for: The functional and predictive roles of miR-210 in cryptorchidism
Source: PubMed Central journal article supplement (PMC5000482; doi:10.1038/srep32265), 2016-08-26
Supplement: srep32265-s1.pdf [file srep32265-s1.pdf]

# Title: The functional and predictive roles of miR-210 in cryptorchidism

Zhengzheng Duan<sup>1</sup>, Helong Huang<sup>1</sup>, Fei Sun<sup>1,2\*</sup>

## Supplementary Information

Fig. S1. *Insl3* and *Lgr8*'s expression in cryptorchidism mice.

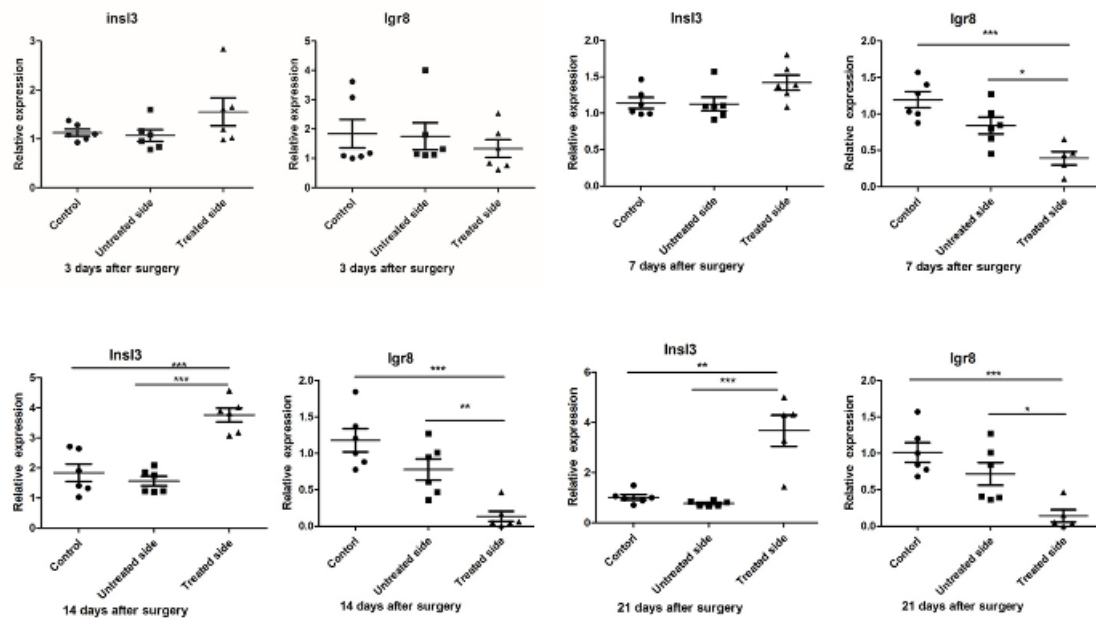

Figure.S2. Different genes' expression in cryptorchidism patients and normal controls.

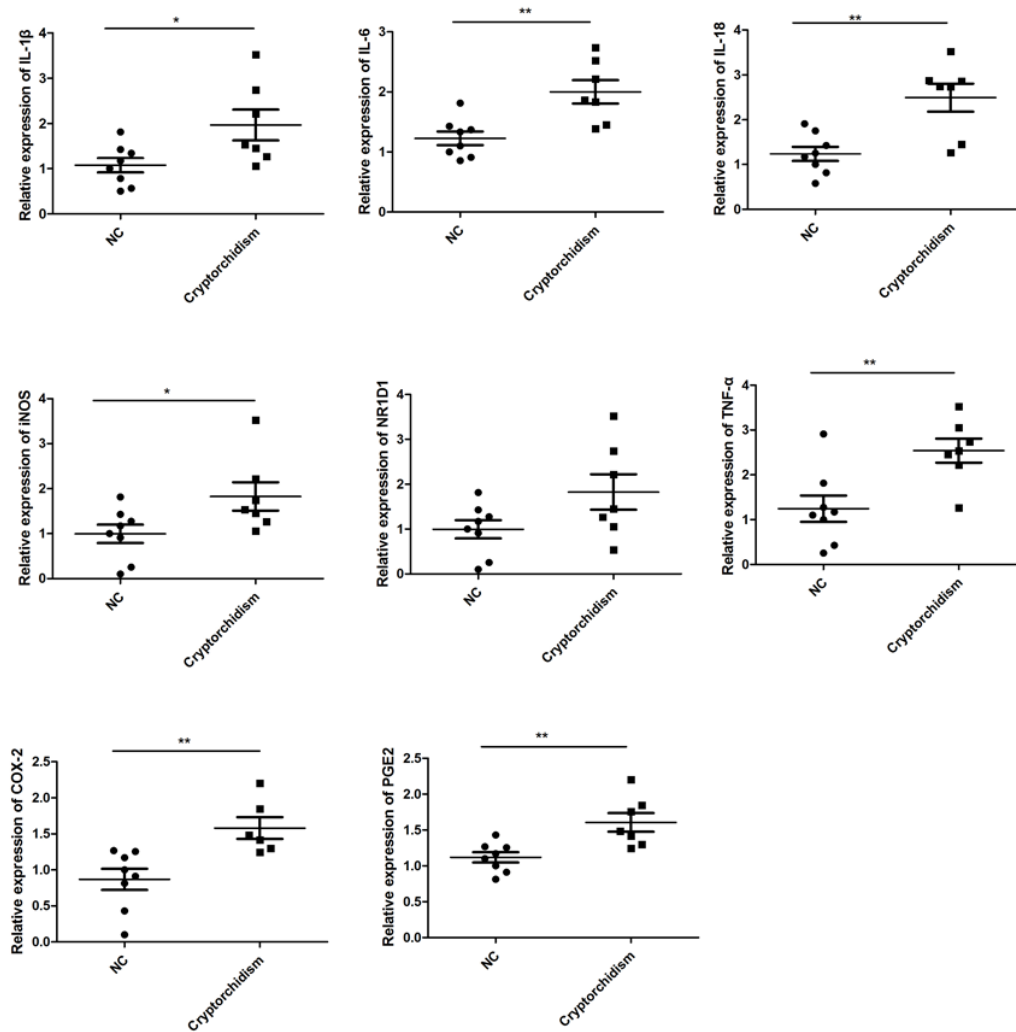

**Figure.S3. The original images of Western Blot.**

The upper blots of the two images are  $\beta$ -actin and NR1D2, meanwhile the other blots in the images were irrelevant to this article.

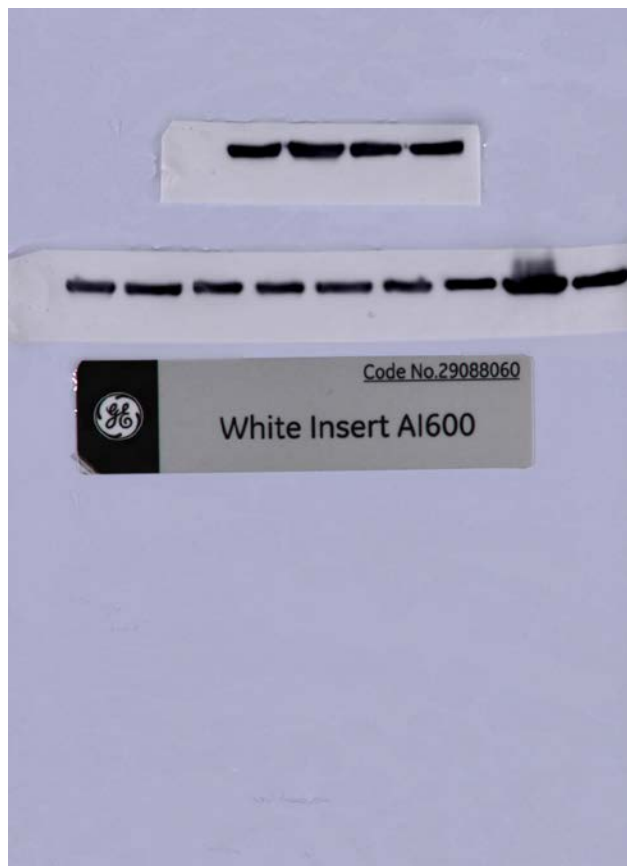

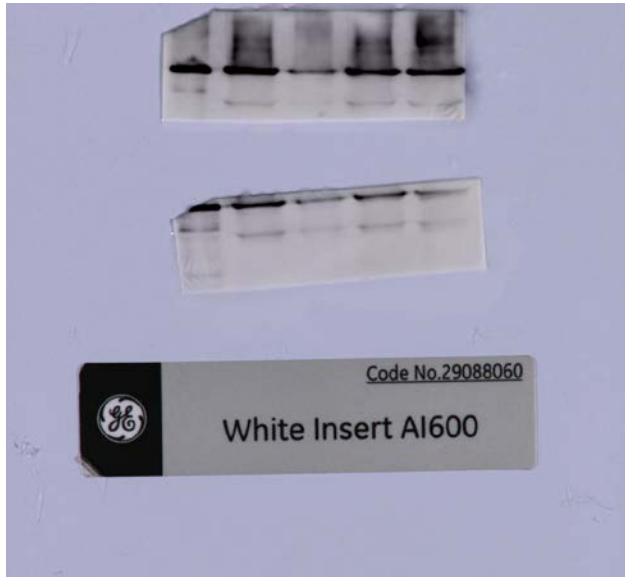

**Figure.S4. MiR-210's expression in different cell lines.**

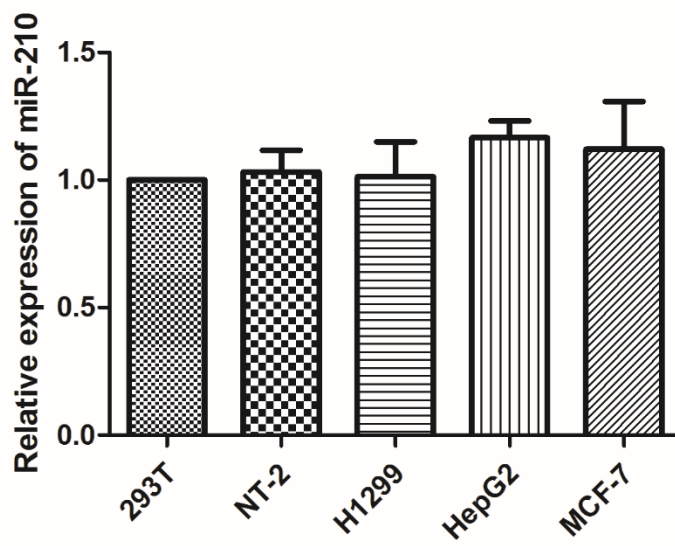

Figure.S5. Different genes' expression in cryptorchidism mice.

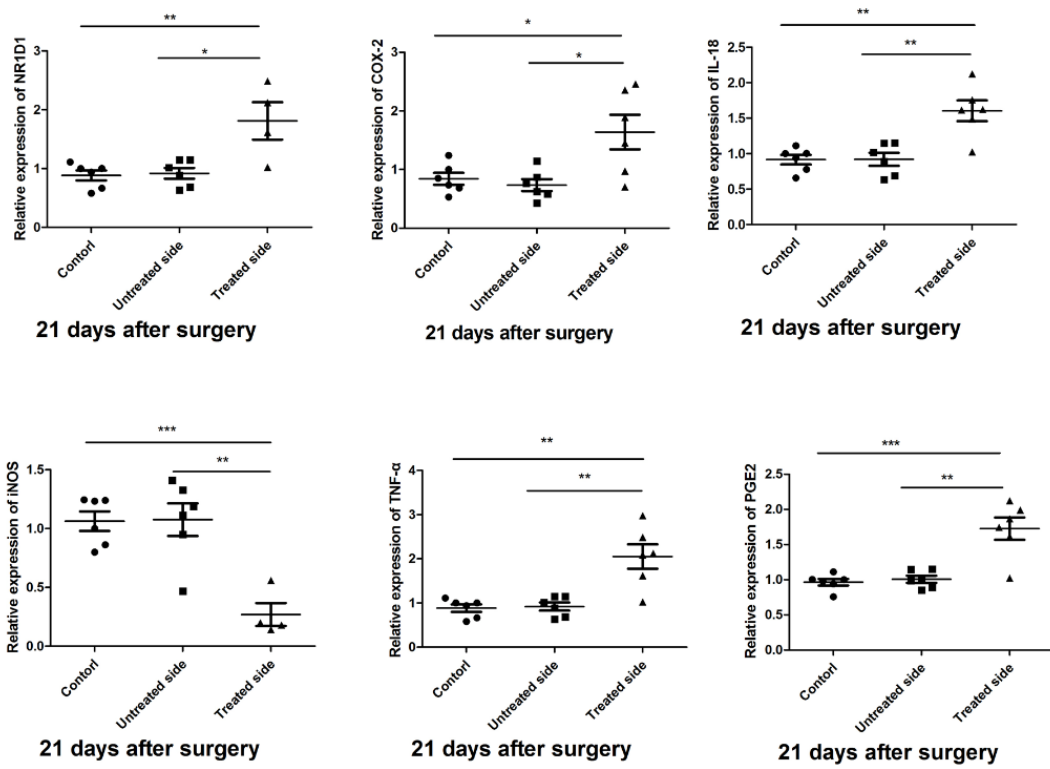

| Table.1.             | Real-time PCR Primers         |                                 |
|----------------------|-------------------------------|---------------------------------|
|                      | Forward primer                | Reverse primer                  |
| human $\beta$ -actin | 5'-TGGCACCCAGCACAATGAA-3'     | 5'-CTAAGTCATAGTCCGCCTAGAAGCA-3' |
| mouse $\beta$ -actin | 5'-TGGCTCCTAGCACCATGAA-3'     | 5'-CTCAGTAACAGTCCGCCTAGAAGCA-3' |
| human NR1D2          | 5'-TGGTGGCCTTTGCTTCGT-3'      | 5'-TGCGGCTTAGGAACATCAC-3'       |
| mouse NR1D2          | 5'-AGCCCAAAGATGAGCCTAATTC-3'  | 5'-GGTCTCTATCTGGCTGATGCA-3'     |
| human IL-6           | 5'-GGTGCCCATGCTACATTTGC-3'    | 5'-GGTTCAGGTGACACCACAAATTC-3'   |
| mouse IL-6           | 5'-CACGGCCTTCCTACTTCAC-3'     | 5'-ACAGGTCTGTTGGGAGTGGTA-3'     |
| mouse Insl3          | 5'-GGTGCCCATGCTACATTTGC-3'    | 5'-GCCTGTGGTCTTGGTACTG-3'       |
| mouse Lgr8           | 5'-GCCTGTGGTCTTGGTACTG-3'     | 5'-CCTGGAGATCCACCCTGTATCAG-3'   |
| human NR1D1          | 5'-TGGTGGCCTTTGCTTCGT-3'      | 5'-TGCGGCTTAGGAACATCAC-3'       |
| mouse NR1D1          | 5'-GCTTCTCCGTTGGCATGTCT-3'    | 5'-CCAAGTTCATGGCGCTCT-3'        |
| human iNOS           | 5'-GTGGCCACACCCTGAAG-3'       | 5'-CCTCGACCTGCTCCTCATTC-3'      |
| mouse iNOS           | 5'-TGCTCCCTCCGAAGTTTCTG-3'    | 5'-TCATCGGGCCTCCTTTGAG-3'       |
| human p21            | 5'-CGCTAATGGCGGGCTG-3'        | 5'-CGGTGACAAAGTCGAAGTTC-3'      |
| mouse p21            | 5'-GTGATTGCGATGCGCTCATG-3'    | 5'-TCTCTTGCAGAAGACAATC-3'       |
| human COX-2          | 5'-GCTAGCCCAAGAATATTGTC-3'    | 5'-GTGGCTGAACAAATTAACGAAGCAT-3' |
| mouse COX-2          | 5'-GGGTGTCCCTTCACTTCTTCA-3'   | 5'-GGGAGGCACTTGCAATTGATG-3'     |
| human TNF- $\alpha$  | 5'-GAGGCCAAGCCCTGCG-3'        | 5'-CGGGCCGATTGATCTCAGC-3'       |
| mouse TNF- $\alpha$  | 5'-CTGTCTACTGAACCTTCGGGGT-3'  | 5'-GAGTGTGAGGGTCTGGGC-3'        |
| human PGE-2          | 5'-AGACGGACCACCTCATTCTC-3'    | 5'-AGGCCTAAGGATGGCAAAGA-3'      |
| mouse PGE-2          | 5'-AGGTTAATGGCTCAGTCCT-3'     | 5'-CAGCCCTTACACTTCTCCA-3'       |
| human IL-18          | 5'-GGAAATCGGCCTCTATTGAAGA-3'  | 5'-GTCCGGGGTGCATTATCTCT-3'      |
| mouse IL-18          | 5'-ACTTTGGCCGACTTCACTGT-3'    | 5'-GGGTTCACTGGCACTTTGAT-3'      |
| human IL-1 $\beta$   | 5'-GACCTGAGCACCTTCTTCCCTTC-3' | 5'-GCAGTTCAGTGATCGTACAGGTGC-3'  |
| mouse IL-1 $\beta$   | 5'-TGGGCCTCAAAGGAAAGAAT-3'    | 5'-CAGGCTTGTGCTGCTTGT-3'        |

| Table.2           |                         |
|-------------------|-------------------------|
| Name              | Sequence (5' to 3')     |
| LNA scramble-miR  | GTGTAACACGTCTATAACGCCCA |
| LNA hsa-miR-210   | TCAGCCGCTGTACACGCACAG   |
| Inhibitor NC      | CAGUACUUUUGUGUAGUACAA   |
| miR-210 inhibitor | UCAGCCGCUUGUCACACGCACAG |
| mimic NC & si.NC  | UUCUCCGAACGUGUCACGUTT   |
|                   | ACGUGACACGUUCGGAGAATT   |
| miR-210 mimic     | CUGUGCGUGUGACAGCGGCUGA  |
|                   | AGCCGCUUGUCACACGCACAGUU |
